# Supplementary material for: Hedgehog signaling is required for endomesodermal patterning and germ cell development in the sea anemone Nematostella vectensis
Source: eLife. 2020 Sep 24;9:e54573. doi: 10.7554/eLife.54573 (PMC7515634; doi:10.7554/eLife.54573)
Supplement: Figure 1—figure supplement 2—source data 1. [file elife-54573-fig1-figsupp2-data1.csv]

A-8d-s2	A-8d-s8	B-8d-s2	B-8d-s8	B-12d-s2	B-12d-s8	C-8d-s2	C-8d-s8	C-12d-s2	C-12d-s8	C-16d-s2	C-16d-s8
4	7	4	2	10	4	0	5	0	0	8	6
2	5	0	3	8	7	1	2	0	3	0	1
7	4	8	9	3	2	5	5	9	4	7	9
2	2	3	14	5	3	1	5	0	14	1	0
4	9	2	5	0	0	0	4	9	1	17	0
7	7	7	2	11	12	8	9	3	4	2	8
3	1	8	5	2	2	0	22	6	1	3	5
2	10	8	6	1	0	13	4	15	9	3	2
10	10	4	7	3	11	0	5	12	3	3	3
6	4	1	2	7	9	6	7	4	4	6	4
17	15	5	5	5	4	6	4	4	0	3	4
0	2	6	3	0	0	6	14	0	7	4	6
3	2	9	6	14	6	8	6	5	8	1	5
10	16	9	9	1	2	4	0	6	5	2	9
11	10	0	1	6	2	3	7	12	6	0	1
7	6	8	0	0	1	7	8	10	10	8	4
4	0	0	0	6	10	3	3	7	12	3	7
6	13	0	7	0	0	8	13	4	6	12	9
3	5	4	2	2	4	4	3	3	11	6	6
1	0	1	6	3	1	9	14	9	7	8	7
5	5	2	4	4	1	10	0	5	0	3	4
7	9	0	1	5	0	9	15	3	7	3	1
13	9	0	0	0	3	2	0	3	2	0	0
0	2	0	0	6	6	4	13	2	2	11	2
1	0	1	4	3	1					1	2
7	6	14	5	1	7					5	2
12	7	15	11	0	0					6	5
3	2	1	7	1	0
0	0	10	10	7	5
0	2
0	0
7	12
5	8
4	12
12	4
1	12
0	6
6	5
0	0
7	4
7	8
6	5
12	4
0	8
1	11
0	4
5	9
5	4
21	13
5	8
5	12
1	0
13	12
11	6
4	10
3	4
