# Supplementary material for: Hedgehog signaling is required for endomesodermal patterning and germ cell development in the sea anemone Nematostella vectensis
Source: eLife. 2020 Sep 24;9:e54573. doi: 10.7554/eLife.54573 (PMC7515634; doi:10.7554/eLife.54573)
Supplement: Figure 1—source data 1. [file elife-54573-fig1-data1.csv]

A.8d	B.8d	B.12d	C.8d	C.12d	C.16d
11	6	14	5	0	14
7	3	15	3	3	1
11	17	5	10	13	16
4	17	8	6	14	1
13	7	0	4	10	17
14	9	23	17	7	10
4	13	4	22	7	8
12	14	1	17	24	5
20	11	14	5	15	6
10	3	16	13	8	10
32	10	9	10	4	7
2	9	0	20	7	10
5	15	20	14	13	6
26	18	3	4	11	11
21	1	8	10	18	1
13	8	1	15	20	12
4	0	16	6	19	10
19	7	0	21	10	21
8	6	6	7	14	12
1	7	4	23	16	15
10	6	5	10	5	7
16	1	5	24	10	4
22	0	3	2	5	0
2	0	12	17	4	13
1	5	4			3
13	19	8			7
19	26	0			11
5	8	1
0	20	12
2
0
19
13
16
16
13
6
11
0
11
15
11
16
8
12
4
14
9
34
13
17
1
25
17
14
7
