# Supplementary material for: Hedgehog signaling is required for endomesodermal patterning and germ cell development in the sea anemone Nematostella vectensis
Source: eLife. 2020 Sep 24;9:e54573. doi: 10.7554/eLife.54573 (PMC7515634; doi:10.7554/eLife.54573)
Supplement: Figure 7—source data 1. [file elife-54573-fig7-data1.csv]

GFP-shRNA	Hh1-shRNAa	Hh1-shRNAb	gli-shRNA
16	3	0	0
9	0	0	0
15	5	3	0
10	0	9	0
0	0	3	5
5	5	0	0
0	0	2	4
3	7	0	2
11	6	0	2
0	12	0	5
3	4	2	0
7	1	4	0
6	9	0	0
3	9	0	0
12	0	0	0
10	0	0	0
11	10	0	0
0	4	0	5
11	0	0	0
16	0	6	0
0	6	0	7
10	5	6	0
5	0	1	0
8	0	8	8
2	4	0	2
0	0	0	0
7	0	0	7
4	0	0	0
0	4	0
6	0	0
	0	0
	0	0
	0	0
	0	2
	2	0
	3	3
	0	0
		0
		3
		3
