# Supplementary material for: Hedgehog signaling is required for endomesodermal patterning and germ cell development in the sea anemone Nematostella vectensis
Source: eLife. 2020 Sep 24;9:e54573. doi: 10.7554/eLife.54573 (PMC7515634; doi:10.7554/eLife.54573)
Supplement: Figure 7—source data 2. [file elife-54573-fig7-data2.csv]

control-gRNA	gli-gRNA
7	0
0	0
12	0
19	0
26	0
11	0
10	0
6	0
13	0
11	0
22	6
39	0
7	3
7	0
23	0
