# Supplementary material for: Hedgehog signaling is required for endomesodermal patterning and germ cell development in the sea anemone Nematostella vectensis
Source: eLife. 2020 Sep 24;9:e54573. doi: 10.7554/eLife.54573 (PMC7515634; doi:10.7554/eLife.54573)
Supplement: Figure 8—figure supplement 1—source data 1. [file elife-54573-fig8-figsupp1-data1.csv]

Ctrl	GDC	Ctrl-Ctrl	Ctrl-GDC	GDC-GDC	GDC-Ctrl
53	8	15	9	27	18
42	11	11	4	17	18
20	5	9	33	10	10
11	2	8	9	34	3
20	11	29	24	15	21
27	2	4	5	12	6
33	1	35	21	23	3
15	22	4	0	21	22
34	12	11	8	34	29
24	2	24	17	4	14
12	10	15	13	15	41
12	19	5	6	27	35
14	13	11	17	0	6
39	11	16	1	0	9
9	25	14	5	34	0
18	11	17	14	0	2
6	26	4	8	8	8
0	3	10	15	11	26
1	22	1	5	3	35
20	10	3	4	8	20
29	14	29	35	13	8
31	15	16	20	0	3
7	2	25	45	3	32
34	2	24	17	15	12
9	7	27	24	13	43
38	21	11	4	34	10
76	3	16	39	0	16
74	6	32	8	1	0
24	4	24	36	0	1
5	13	.	63	15	16
