# Supplementary material for: Hedgehog signaling is required for endomesodermal patterning and germ cell development in the sea anemone Nematostella vectensis
Source: eLife. 2020 Sep 24;9:e54573. doi: 10.7554/eLife.54573 (PMC7515634; doi:10.7554/eLife.54573)
Supplement: Figure 8—source data 1. [file elife-54573-fig8-data1.csv]

	Control				GDC-0449				Cyclopamine
Count	Field of View1	Field of View2	Field of View3	Field of View4	Field of View1	Field of View2	Field of View3	Field of View4	Field of View1	Field of View2	Field of View3	Field of View4
Normal	45	34	54	41	62	33	49	48	47	53	58	40
Aberrant dev	4	3	7	6	12	2	3	14	7	4	7	6
Ratio	Control	GDC-0449	Cyclopamine
Normal	89.7%	86.1%	89.2%
Aberrant dev	10.3%	13.9%	10.8%
