# Supplementary material for: Hedgehog signaling is required for endomesodermal patterning and germ cell development in the sea anemone Nematostella vectensis
Source: eLife. 2020 Sep 24;9:e54573. doi: 10.7554/eLife.54573 (PMC7515634; doi:10.7554/eLife.54573)
Supplement: Figure 8—source data 2. [file elife-54573-fig8-data2.csv]

Control	GDC-0449	Cyclopamine
12	0	12
28	0	7
13	6	10
24	11	7
19	0	1
23	13	23
21	12	11
32	13	12
20	0	0
19	1	10
12	0	8
16	17	12
0	0	0
7	8	9
25	7	2
20	0	26
19	14	12
7	0	10
17	7	8
21	6	9
18	14	7
	4	13
	0	0
	7	29
